**A-770 Room D, 10/17/2000 9:00 AM - 11:00 AM (PS)**  
**Thermoregulatory Effects of the Nonimmobilizer 1,2-Dichlorohexafluorocyclobutane** *James M. Sonner, MD; Anya J. Maurer, BS; Daniel I. Sessler, MD; Edmond I. Eger, II, MD, Anesthesiology and Perioperative Care, University of California, San Francisco, San Francisco, CA, United States.* Unlike isoflurane, a nonimmobilizer has minimal effects on thermoregulation in rats.

**A-771**      **Room D, 10/17/2000 9:00 AM - 11:00 AM (PS)**  
**Treatment of Chronic Low Back Pain by Local Injection of Botulinum Toxin A** *Bill Subin, MD; Georgia A. Morgan First, BS; Randall C. Cork, MD, PhD, Anesthesiology, LSU Health Sciences Center, Shreveport, LA, United States.* Comparison between untreated and BTA-treated chronic low back pain demonstrates that BTA appears to reduce muscle spasm and relieve pain.

**A-772 Room D, 10/17/2000 9:00 AM - 11:00 AM (PS)**  
**Volatile Anesthetic Effects on Calcium and NADPH Requirements of NOS** *Thomas M. Tagliente, MD, PhD, Anesthesiology, Mt Sinai School of Medicine, New York, NY, United States.* The effects of halothane, isoflurane and ionic strength on  $\text{Ca}^{2+}$  and NADPH requirements of NOS were studied. Ionic strength significantly affects the  $\text{EC}_{50}$  of  $\text{Ca}^{2+}$  but the VAs are without effect.

**A-773 Room D, 10/17/2000 9:00 AM - 11:00 AM (PS)**  
**Xenon Increases Norepinephrinergergic Neuronal Activities in Rat Medial Preoptic Area and Posterior Hypothalamus: Comparison with Nitrous Oxide** *Hitosbi Yoshida, MD; Tetsuya Kusbikata, MD; Takeshi Kubota, MD; Kazuyoshi Hirota, MD; Akitomo Matsuki, MD, Anesthesiology, University of Hiroasaki, Hiroasaki, Aomori-ken, Japan.*  
 Xe increases ENE in the MPO and PH, but N<sub>2</sub>O does only in the MPO.

**A-774** Room D, 10/17/2000 9:00 AM - 11:00 AM (PS)  
**Mutation of an Anesthetic-Photolabeled Residue in the nAChR Pore Alters Sensitivity to GAs** *Qiong L. Zhou, PhD; Stuart A. Forman, MD-PbD, Dept. of Anesthesia and Critical Care, MGH, Boston, MA.* The  $\alpha$ E262L mutation decreases nAChR sensitivity to inhibition by GAs.

**A-775 Room D, 10/17/2000 2:00 PM - 4:00 PM (PS)**  
**The Amnestic, But Not Anesthetic, Effect of Propofol is Prevented by Selective Lesions of the Basolateral Amygdala** *M.T. Alkire, M.D.; A. Vazdarjanova, Ph.D.; H. Dickinson-Anson, Ph.D.; N. White, B.S.; L. Cabill, Ph.D., Anesthesiology, University of California, Irvine, CA, United States.* Multiple sites, multiple mechanisms of anesthesia: a site identified? Evidence the amygdala may mediate anesthetic-induced amnesia.

**A-776 Room D, 10/17/2000 2:00 PM - 4:00 PM (PS)**  
**Low Concentrations of Isoflurane Block Long Term Potentiation of Hippocampal Neuron Synapses** *Rodney J. Anderson; Brita Hornung, MD; Sky Pittson, BS (MD); Frances A. Monroe, BA; M. Bruce MacIver, MSc PhD, Anesthesia, Stanford University School of Medicine, Stanford, CA, United States.* Loss of recall occurs at less than 0.4 MAC in humans, 0.36 MAC was needed to block synaptic LTP found in the present study.

**A-777 Room D, 10/17/2000 2:00 PM - 4:00 PM (PS)**  
**Pentobarbital Enhances Synaptic Transmission in Rat Hip-**  
**ocampus** *David P. Archer, MD; Naaznin Samanani, BSc; Sheldon*  
*H. Roth, PhD, Department of Anesthesiology, University of Calgary,*  
*Calgary, Canada.* Very low concentrations of pentobarbital (1-5  
 $\mu\text{M}$ ) produce persistent enhancement of synaptic transmission by  
 mechanisms involving GABA<sub>A</sub> receptors and bicarbonate ion.

**A-778 Room D, 10/17/2000 2:00 PM - 4:00 PM (PS)**  
**Volatile Anesthetics Dose-Dependently Disrupt Spontaneous**  
**Ca<sup>2+</sup>-Oscillations in Hippocampal Neuronal Networks** *Claudia*  
*Benkowitz, MD; Petrus Tas, PhD; Frank Kobelt, PhD; Norbert Roeuer,*  
*MD, Dept. of Anesthesiology, University of Wuerzburg, Wuerzburg,*  
*Germany.* Disruption of calcium-oscillations in neuronal networks  
 might reflect a common mechanism of anesthetic action.

**A-779 Room D, 10/17/2000 2:00 PM - 4:00 PM (PS)**  
**Chronic Administration of Opioids and Psychostimulants Alter RGS4 mRNA Levels in Rat Brain** *Gavin B. Bishop, B.S.; Eileen J. Curran; Stanley J. Watson; Huda Akil, Ph.D.; Howard B. Gutstein, M.D., Anesthesiology, M.D. Anderson Cancer Center, Houston, TX, United States.* The current study demonstrates RGS4 mRNA is altered by chronic treatment of opioids and psychostimulants.

**A-780 Room D, 10/17/2000 2:00 PM - 4:00 PM (PS)**  
**Effects of Morphine, Meperidine, and Fentanyl Derivatives on Nociceptor Activation, Vasodilation, and Mast Cell Degranulation in Human Skin** James A. Blunk, MD; Wolfgang Koppert, MD; Susanne Zeck, MD; Reinhard Sittl, MD; Martin Schmelz, MD, Dept. of Anesthesiology, Univ. Erlangen, Erlangen, Germany. Dermal microdialysis discerned between mast cell activation and unspecific vasodilation by opioids.

**A-781 Room D, 10/17/2000 2:00 PM - 4:00 PM (PS)**  
**Differential Sensitivity of GABA and NMDA Receptors to Isoflurane** *Hugh E. Criswell, PhD; Zhen Ming, PhD; George R. Breese, PhD; Robert A. Mueller, MD, Anesthesiology, U.N.C., Chapel Hill, NC, United States.* Isoflurane enhanced GABA currents in neurons with no effect below 1/4 MAC and inhibited NMDA currents as low as 1/30 MAC. NMDA antagonism may mediate side effects of isoflurane during recovery.

**A-782 Room D, 10/17/2000 2:00 PM - 4:00 PM (PS)**  
**Is Opioid Tolerance a Unitary Phenomenon? Insights from Proteomics** Howard B. Gutstein, MD; Heju Zhang, BS, Anesthesiology, UT-MD Anderson Cancer Center, Houston, TX, United States. The time course of changes in protein expression caused by chronic opioid administration are not uniform for all cell types.

**A-783 Room D, 10/17/2000 2:00 PM - 4:00 PM (PS)**  
**Opioid Withdrawal Activates ERK in N2A Neuroblastoma Cells: A Potential Role for ERK Signaling in Opioid Dependence and Withdrawal** *Howard B. Gutstein, MD, Anesthesiology, UT-MD Anderson Cancer Center, Houston, TX, United States.* Regulation of the ERK signaling system may play a role in the development of dependence on opioids and the associated opioid withdrawal syndrome.
